# Supplementary material for: Phylogenetic Investigations of Dengue 2019–2021 Outbreak in Guadeloupe and Martinique Caribbean Islands
Source: MDPI journal article supplement (doi:10.3390/pathogens12091182), 2023-09-20
Supplement: s1 [file s1]

## Supplementary data

**Table S1.** References of complete genome sequences from GenBank used in this study.

| Country       | Year of Collection | Serotype | Genotype | Genbank Number |
|---------------|--------------------|----------|----------|----------------|
| Saint Martin  | 2021               | DENV-1   | V        | OP895911       |
| Florida       | 2020               | DENV-1   | V        | OM909246       |
| Ecuador       | 2007               | DENV-1   | V        | OK605756       |
| Haiti         | 2014               | DENV-1   | V        | KT279761       |
| Puerto Rico   | 2006               | DENV-1   | V        | EU482591       |
| Venezuela     | 1997               | DENV-1   | V        | GU056029       |
| Venezuela     | 2005               | DENV-1   | V        | FJ810415       |
| Argentina     | 2009               | DENV-1   | V        | KC692506       |
| Brazil        | 2010               | DENV-1   | V        | JX669463       |
| Argentina     | 2010               | DENV-1   | V        | KC692516       |
| Colombia      | 1999               | DENV-1   | V        | GQ868561       |
| Ecuador       | 2014               | DENV-1   | V        | KY474307       |
| Colombia      | 2008               | DENV-1   | V        | GQ868570       |
| Colombia      | 2021               | DENV-1   | V        | OM654347       |
| Venezuela     | 2015               | DENV-1   | V        | MH450303       |
| Peru          | 2021               | DENV-1   | V        | ON123585       |
| French Guiana | 1989               | DENV-1   | V        | AF226687       |
| India         | 1963               | DENV-1   | V        | JQ922544       |
| India         | 1956               | DENV-1   | V        | KF289073       |
| India         | 2021               | DENV-1   | V        | OQ339083       |
| Thailand      | 1980               | DENV-1   | V        | AY732476       |
| India         | 1971               | DENV-1   | V        | JQ922546       |
| Gabon         | 2012               | DENV-1   | V        | MG877557       |
| Ivory Coast   | 1998               | DENV-1   | V        | AF298807       |
| Australia     | 2008               | DENV-1   | I        | KR919821       |
| Sri Lanka     | 2020               | DENV-1   | I        | OQ080034       |

|                  |      |        |              |          |
|------------------|------|--------|--------------|----------|
| China            | 2015 | DENV-1 | I            | MG840551 |
| Singapore        | 2011 | DENV-1 | I            | MF033196 |
| Thailand         | 2017 | DENV-1 | I            | LC410183 |
| Cambodia         | 2000 | DENV-1 | I            | GQ868637 |
| New Caledonia    | 2013 | DENV-1 | I            | MG877555 |
| Thailand         | 1986 | DENV-1 | I            | JN638336 |
| Vietnam          | 2008 | DENV-1 | I            | FJ410214 |
| Taiwan           | 1994 | DENV-1 | I            | AB608788 |
| Malaysia         | 2005 | DENV-1 | I            | JN697057 |
| Thailand         | 1960 | DENV-1 | II           | JQ922547 |
| Thailand         | 1964 | DENV-1 | II           | AF180817 |
| Malaysia         | 1972 | DENV-1 | III          | EF457905 |
| Philippines      | 2016 | DENV-1 | IV           | LC128301 |
| Nauru Island     | 1974 | DENV-1 | IV           | U88535   |
| Micronesia       | 2004 | DENV-1 | IV           | AB204803 |
| Indonesia        | 1998 | DENV-1 | IV           | AB189121 |
| Seychelles       | 2003 | DENV-1 | IV           | AB195673 |
| Reunion island   | 2004 | DENV-1 | IV           | DQ285560 |
| French Polynesia | 2008 | DENV-1 | IV           | MG181997 |
| Hawai            | 2001 | DENV-1 | IV           | DQ672562 |
| Malaysia         | 2005 | DENV-1 | IV           | JN697056 |
| Easter Island    | 2002 | DENV-1 | IV           | EU863650 |
| Reunion Island   | 2018 | DENV-2 | Cosmopolitan | MN272404 |
| India            | 2016 | DENV-2 | Cosmopolitan | MK858111 |
| Singapore        | 2017 | DENV-2 | Cosmopolitan | MW512468 |
| China            | 2017 | DENV-2 | Cosmopolitan | MH827529 |
| Saudi Arabia     | 2016 | DENV-2 | Cosmopolitan | MN294937 |
| India            | 2001 | DENV-2 | Cosmopolitan | DQ448231 |
| Pakistan         | 2009 | DENV-2 | Cosmopolitan | KF041237 |
| Seychelles       | 2016 | DENV-2 | Cosmopolitan | MN272405 |

|               |      |        |                |          |
|---------------|------|--------|----------------|----------|
| Australia     | 1993 | DENV-2 | Cosmopolitan   | AY037116 |
| Burkina Faso  | 2016 | DENV-2 | Cosmopolitan   | KY627763 |
| China         | 2003 | DENV-2 | Cosmopolitan   | FJ196853 |
| Indonesia     | 1975 | DENV-2 | Cosmopolitan   | GQ398258 |
| Indonesia     | 1998 | DENV-2 | Cosmopolitan   | AB189124 |
| Brunei        | 2005 | DENV-2 | Cosmopolitan   | EU179857 |
| Singapore     | 2016 | DENV-2 | Cosmopolitan   | MW512449 |
| India         | 2013 | DENV-2 | Cosmopolitan   | MH822956 |
| China         | 2018 | DENV-2 | Cosmopolitan   | MK783206 |
| France        | 2014 | DENV-2 | Cosmopolitan   | MN720746 |
| India         | 2016 | DENV-2 | Cosmopolitan   | MK858107 |
| India         | 2016 | DENV-2 | Cosmopolitan   | OQ339137 |
| India         | 2019 | DENV-2 | Cosmopolitan   | OP310805 |
| Malaysia      | 1970 | DENV-2 | Sylvatic       | EF105379 |
| Burkina Faso  | 1980 | DENV-2 | Sylvatic       | EF105386 |
| French Guiana | 1993 | DENV-2 | Asian/American | EU920828 |
| Venezuela     | 2015 | DENV-2 | Asian/American | MH069495 |
| Colombia      | 2019 | DENV-2 | Asian/American | MZ773408 |
| Venezuela     | 2007 | DENV-2 | Asian/American | HQ332190 |
| Colombia      | 2021 | DENV-2 | Asian/American | ON510270 |
| Nicaragua     | 2001 | DENV-2 | Asian/American | GQ199898 |
| Cuba          | 1997 | DENV-2 | Asian/American | AY702037 |
| Thailand      | 1995 | DENV-2 | Asian I        | GQ868543 |
| Vietnam       | 2003 | DENV-2 | Asian I        | EU482782 |
| Thailand      | 2001 | DENV-2 | Asian I        | FJ744714 |
| Cambodia      | 2005 | DENV-2 | Asian I        | FJ639708 |
| Vietnam       | 2004 | DENV-2 | Asian I        | FM210231 |
| Vietnam       | 2004 | DENV-2 | Asian I        | EU482774 |
| China         | 2015 | DENV-2 | Asian I        | KY672945 |
| Laos          | 2010 | DENV-2 | Asian I        | KY849763 |

|                  |      |        |          |          |
|------------------|------|--------|----------|----------|
| Thailand         | 2001 | DENV-2 | Asian I  | DQ181797 |
| Thailand         | 2016 | DENV-2 | Asian I  | LC410184 |
| Thailand         | 1964 | DENV-2 | Asian I  | GQ868591 |
| China            | 2017 | DENV-2 | Asian II | OM256481 |
| Indonesia        | 1975 | DENV-2 | Asian II | GQ398268 |
| Papua New Guinea | 1944 | DENV-2 | Asian II | KM204118 |
| Taiwan           | 2008 | DENV-2 | Asian II | HQ891024 |
| Phillipines      | 1988 | DENV-2 | Asian II | OK605760 |
| Palaos           | 1988 | DENV-2 | Asian II | OK469347 |
| Mexico           | 1983 | DENV-2 | American | GQ868589 |
| Colombia         | 1986 | DENV-2 | American | GQ868592 |
| Colombia         | 1986 | DENV-2 | American | AY702040 |
| Fiji             | 1971 | DENV-2 | American | HM582099 |
| French Polynesia | 1972 | DENV-2 | American | HM582108 |
| American Samoa   | 1972 | DENV-2 | American | HM582104 |
| Tonga            | 1974 | DENV-2 | American | HM582112 |
| Venezuela        | 1987 | DENV-2 | American | GQ868599 |
| Puerto Rico      | 1969 | DENV-2 | American | JX966380 |
| New Caledonia    | 1972 | DENV-2 | American | HM582103 |
| China            | 2016 | DENV-3 | III      | MN018385 |
| India            | 2016 | DENV-3 | III      | MK858153 |
| India            | 2019 | DENV-3 | III      | ON123658 |
| Singapore        | 2013 | DENV-3 | III      | OP410994 |
| Singapore        | 2019 | DENV-3 | III      | OP410997 |
| Pakistan         | 2006 | DENV-3 | III      | KF041259 |
| Thailand         | 2016 | DENV-3 | III      | LC410192 |
| India            | 2008 | DENV-3 | III      | GQ466079 |
| China            | 2009 | DENV-3 | III      | JN662391 |
| Brazil           | 2006 | DENV-3 | III      | OQ727062 |
| Brazil           | 2023 | DENV-3 | III      | OQ706226 |

|                  |      |        |     |          |
|------------------|------|--------|-----|----------|
| India            | 2022 | DENV-3 | III | OQ721955 |
| Ethiopia         | 2019 | DENV-3 | III | ON890788 |
| Senegal          | 2009 | DENV-3 | III | KU509282 |
| Burkina Faso     | 2017 | DENV-3 | III | MT261978 |
| Gabon            | 2016 | DENV-3 | III | LC379196 |
| India            | 2021 | DENV-3 | III | ON109599 |
| Bhutan           | 2019 | DENV-3 | III | OM865816 |
| Thailand         | 2017 | DENV-3 | III | LC410195 |
| China            | 2019 | DENV-3 | III | MW720883 |
| Maldives         | 2019 | DENV-3 | III | ON890789 |
| Singapore        | 2012 | DENV-3 | III | KX380841 |
| French Polynesia | 1989 | DENV-3 | I   | AY744677 |
| East Timor       | 2005 | DENV-3 | I   | AB214882 |
| Indonesia        | 2008 | DENV-3 | I   | KC762689 |
| Indonesia        | 2016 | DENV-3 | I   | MH823209 |
| French Polynesia | 1992 | DENV-3 | I   | AY744683 |
| Cook Islands     | 1991 | DENV-3 | I   | FJ898455 |
| Samoa            | 1995 | DENV-3 | I   | FJ898456 |
| Indonesia        | 2007 | DENV-3 | I   | KC762684 |
| Papua New Guinea | 2008 | DENV-3 | I   | KY794789 |
| Indonesia        | 1998 | DENV-3 | II  | DQ675520 |
| Thailand         | 1993 | DENV-3 | II  | AY676351 |
| Thailand         | 2012 | DENV-3 | II  | MH888332 |
| Bangladesh       | 2002 | DENV-3 | II  | AY496873 |
| Thailand         | 1998 | DENV-3 | II  | AY676348 |
| Thailand         | 1994 | DENV-3 | II  | AY923865 |
| Taiwan           | 1998 | DENV-3 | II  | KY670634 |
| Puerto Rico      | 1963 | DENV-3 | IV  | MW945427 |
| China            | 2000 | DENV-3 | V   | AF317645 |
| Philippines      | 1956 | DENV-3 | V   | KU050695 |

|               |      |        |   |          |
|---------------|------|--------|---|----------|
| Philippines   | 1964 | DENV-3 | V | KM190937 |
| United States | 1963 | DENV-3 | V | JQ922554 |
| Brazil        | 2006 | DENV-3 | V | JN697379 |
| Brazil        | 2007 | DENV-3 | V | EF629370 |
